# Supplementary material for: Intrathymic Notch3 and CXCR4 combinatorial interplay facilitates T-cell leukemia propagation
Source: PubMed Central journal article supplement (PMC6284016; doi:10.1038/s41388-018-0401-2), 2018-07-23
Supplement: 41388_2018_401_MOESM1_ESM.pdf [file 41388_2018_401_MOESM1_ESM.pdf]

# **Intrathymic Notch3 and CXCR4 combinatorial interplay facilitates T-cell leukemia propagation.**

Ferrandino F.<sup>1</sup>, Bernardini G.<sup>2,3</sup>, Tsaouli G.<sup>2,3</sup>, Grazioli P.<sup>1</sup>, Campese A.F.<sup>2</sup>, Noce C.<sup>2</sup>, Ciuffetta A.<sup>2</sup>, Vacca A.<sup>1</sup>, Besharat ZM.<sup>1</sup>, Bellavia D.<sup>2</sup>, Screpanti I.<sup>2,4,5</sup>, and Felli M.P.<sup>1,4,5</sup>.

## **Supplementary Information:**

Supplementary Figures S1-9

## Supplementary Figures

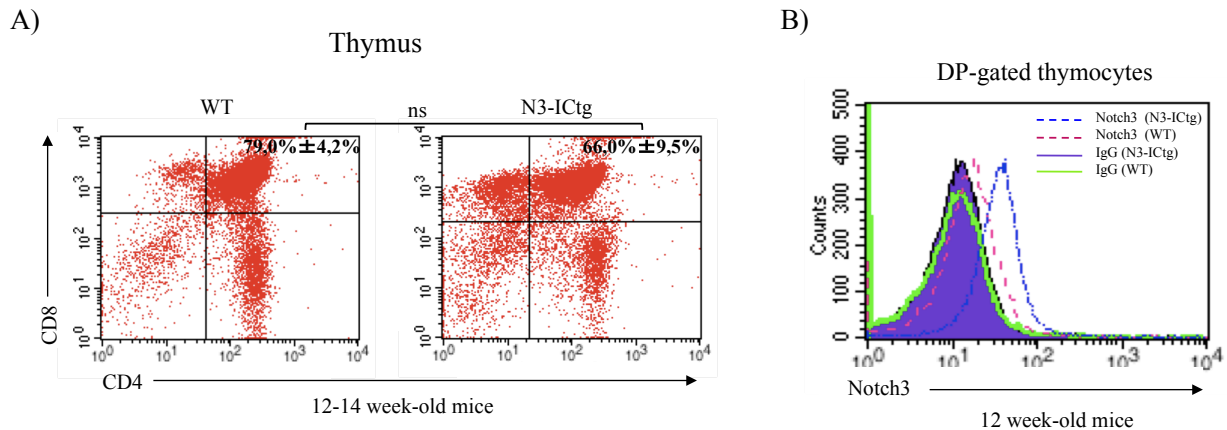

**Supplementary Figure S1. Notch3 expression lasting in CD4<sup>+</sup>CD8<sup>+</sup> thymocytes of 12-14 week-old mice.** A) FACS analysis of CD4<sup>+</sup>CD8<sup>+</sup> thymocytes distribution in representative WT and Notch3-IC transgenic (N3-ICtg) thymi. Average percentages ± SD of DP thymocytes are indicated in plots. (not significant, ns; Student's t-test). B) FACS analysis of Notch3 cell-surface expression of DP-gated thymocytes of WT (Red dotted line) and N3-ICtg (blue dotted line) of 12 week-old mice. Control isotype is shown as green (WT) and purple (N3-ICtg) line.

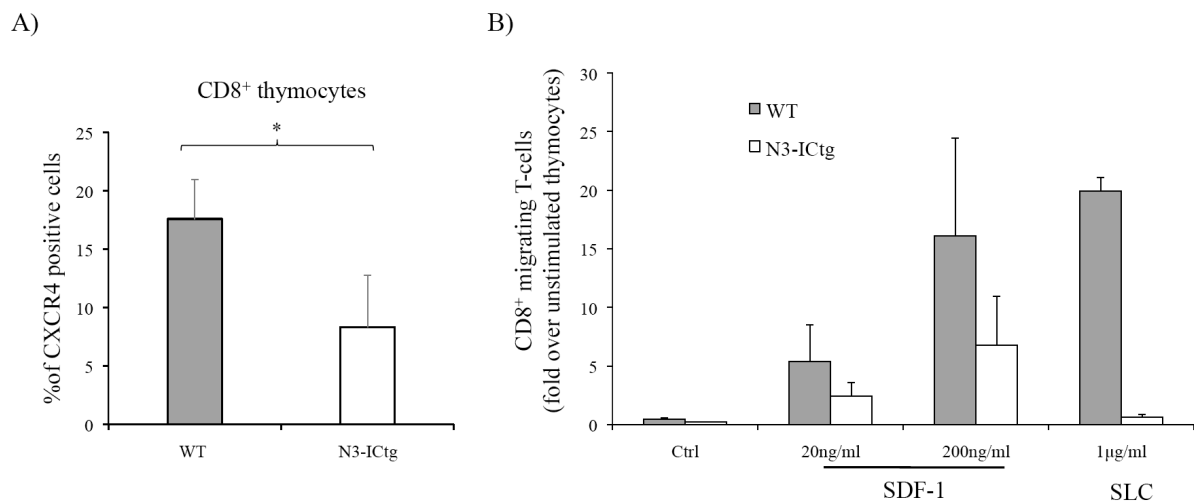

**Supplementary Figure S2. Downmodulation of CXCR4 cell-surface expression and migratory ability of CD8<sup>+</sup> thymocytes in N3-ICtg mice.** In A) the percentages of CD8<sup>+</sup>CXCR4<sup>+</sup> positive T-cells by comparing N3-ICtg versus WT thymocytes. B) *In vitro* migration of CD8<sup>+</sup> thymocytes of N3-ICtg and WT mice in response to 20ng/ml and 200ng/ml of CXCL12/SDF-1 or to 1 µg/ml of an unrelated ligand (Secondary Lymphoid-tissue Chemokine, SLC) in a transwell chemotaxis assay (90 minutes). Evaluation was performed as fold increase of CD8<sup>+</sup> migrating thymocytes percentages in response to SDF-1 stimulated versus unstimulated thymocytes. P-values were calculated using a Student's t-test (\*p<0.05).

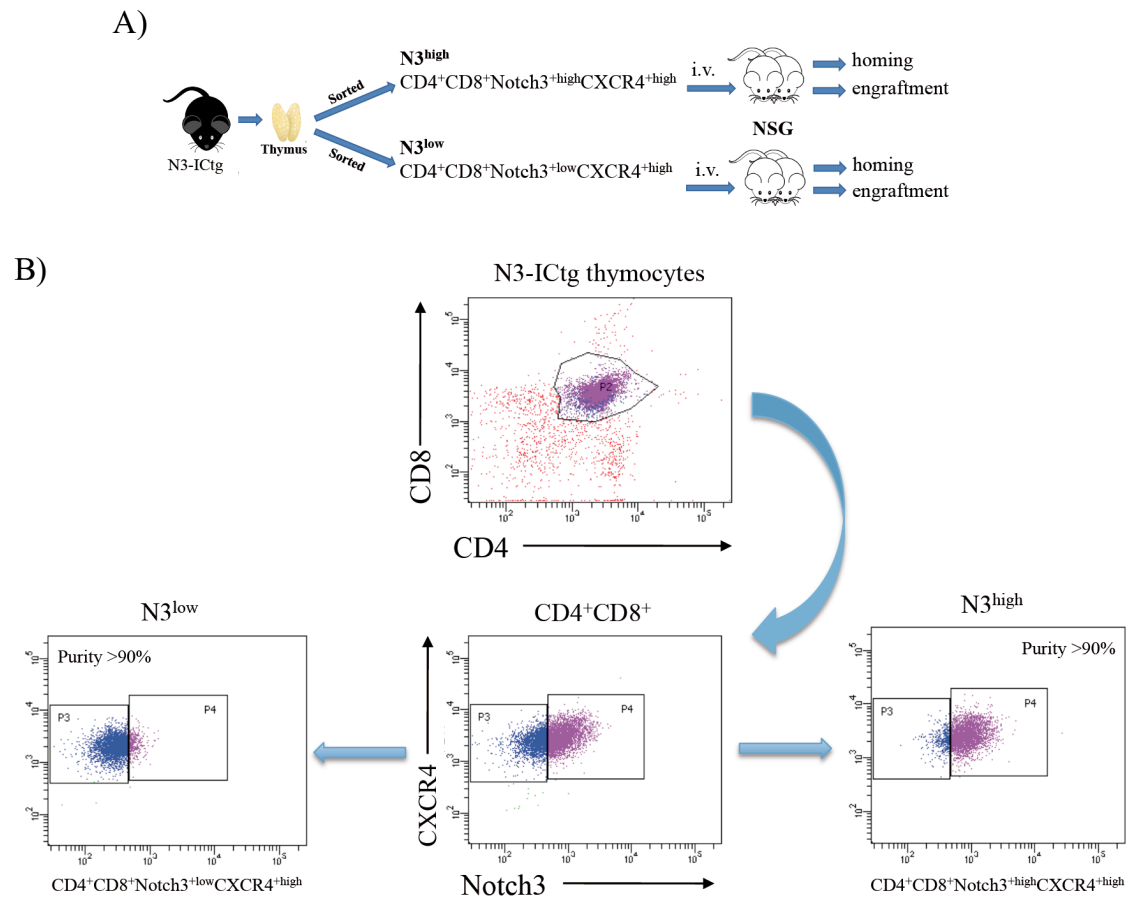

**Supplementary Figure S3. *In vivo* cell transfer in NSG recipient mice. The sorting strategy of  $N3^{\text{high}}$  and  $N3^{\text{low}}$  of N3-ICtg DP thymocytes.** A) Schematic representation of the experiment of thymocytes transfer in NSG mice. Sorted  $CD4^+CD8^+Notch3^{\text{high}}CXCR4^{\text{high}}$  ( $N3^{\text{high}}$ ) or  $CD4^+CD8^+Notch3^{\text{low}}CXCR4^{\text{high}}$  ( $N3^{\text{low}}$ ) thymocytes were intravenously (i.v.) injected in NSG mice. Post-injection flow-cytometry analyses of bone marrow and spleen cells were performed after 1day for homing and after 10 days for engraftment evaluation. B) Schematized in the figure is the flow-cytometry experimental procedure used to purify  $CD4^+CD8^+Notch3^{\text{high}}CXCR4^{\text{high}}$  ( $N3^{\text{high}}$ ) and  $CD4^+CD8^+Notch3^{\text{low}}CXCR4^{\text{high}}$  ( $N3^{\text{low}}$ ) thymocytes from 8 week-old N3-ICtg mice. For FACSARIA sorting, a four color staining was performed. The purity of the selected T-cells is > 90%.  $N3^{\text{high}}$  and/or  $N3^{\text{low}}$  thymocytes were separately injected intravenously ( $2,5 \times 10^6$  purified T-cells i.v.) in immunocompromized NSG mice.

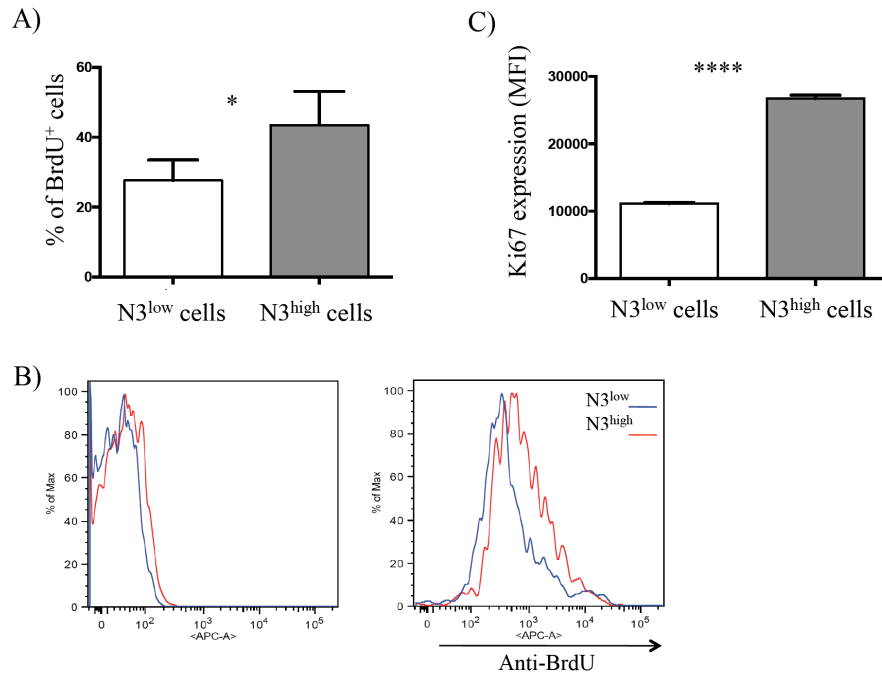

**Supplementary Figure S4. Analysis of *in vivo* and *ex vivo* proliferation rate of N3<sup>high</sup> and N3<sup>low</sup> DP thymocytes of N3-ICtg.** A) *In vivo* BrdU labeling of DP Notch3<sup>+</sup> thymocytes of 8 weeks-old N3-ICtg mice. 24h post-injection the percentage of BrdU positive cells was evaluated at FACSCanto II. P-values were calculated using a Student's t-test (\*p<0.05). B) Flow cytometry analysis with anti-BrdU of Notch3<sup>high</sup> (red line) as opposed to Notch3<sup>low</sup> thymocytes (blue line). C) *Ex vivo* freshly isolated thymocytes of 8 weeks-old N3-ICtg mice were fixed and permeabilized for Ki67 intracellular staining. The Mean Fluorescence Intensity (MFI) is reported. P-values were calculated using a Student's t-test (\*\*\*\*p<0.0001).

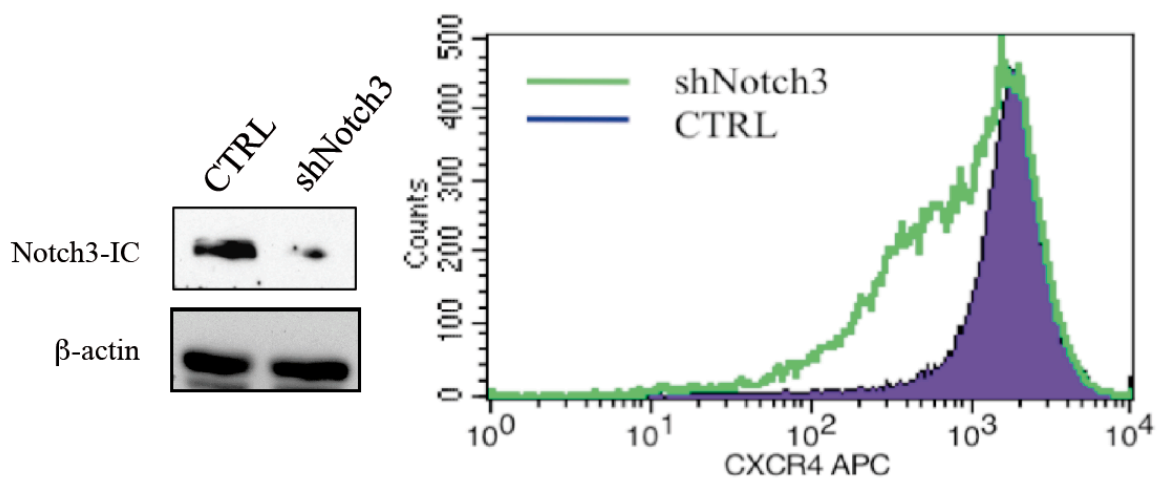

**Supplementary Figure S5.** Left panel, Western blot analysis to monitor Notch3 silencing and  $\beta$ -actin expression. Right panel, FACS analysis of TALL-1 cells silenced with a second independent Notch3 hairpin produced by Dharmacon. 96h post-silencing, CXCR4 expression was monitored in Control (CTRL) versus Notch3 silenced (shNotch3) TALL-1 cells.

A)

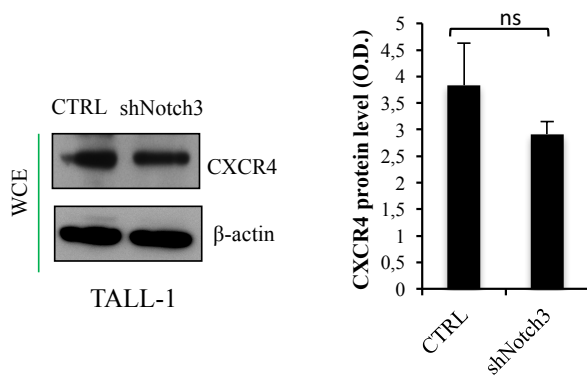

B)

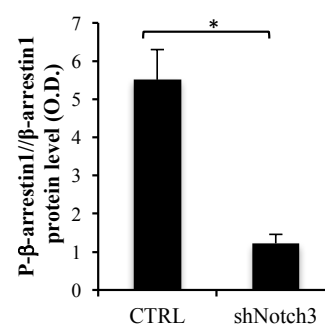

C)

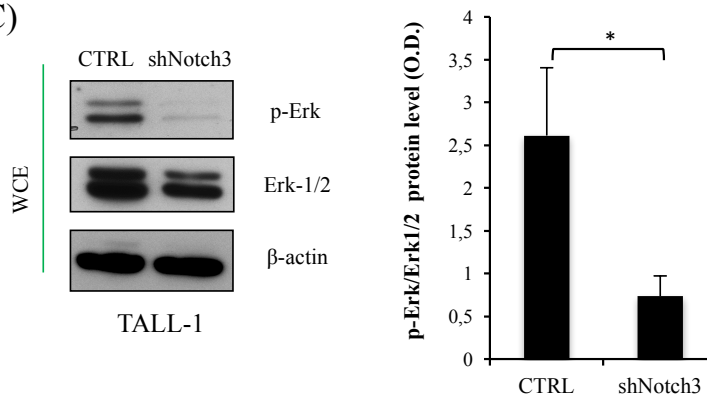

**Supplementary Figure S6. Notch3 silencing impairs phosphorylation of Erk and  $\beta$ -arrestin1 in the human TALL-1 cells.** Whole cell extract (WCE) derived from Notch3-silenced (SantaCruz assay) TALL-1 (shNotch3) versus control cells (CTRL), A) were probed with antibodies for CXCR4 and  $\beta$ -actin. Right panel, Optical Densitometry (OD) of CXCR4 protein analyzed in all the experiments performed. B) Quantification of the ratio between phospho- $\beta$ -arrestin1 over the total  $\beta$ -arrestin1 levels (p- $\beta$ -arrestin1/ $\beta$ -arrestin1) in CTRL and shNotch3 TALL-1 cells. C) Western blot analysis of protein extract of shNotch3 and CTRL cells were immunoblotted for Erk1/2 phosphorylation (p-Erk) or for total Erk protein (Erk1/2) and  $\beta$ -actin. Right panel, Optical Densitometry (OD) of the ratio between p-Erk normalized to the total Erk1/2 signal (p-Erk/Erk1/2) analyzed in all the experiments performed. Average fold change of each protein was calculated by normalization to  $\beta$ -actin levels. P-values, calculated using Student's t-test (ns, not significant; \*P<0.05). Densitometry was performed on scanned immunoblot images using ImageJ.

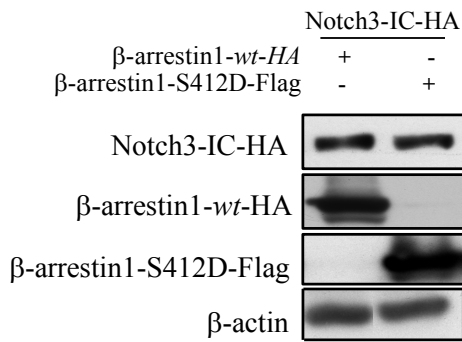

**Supplementary Figure S7. Hek293 cells were transiently co-transfected with N3-IC and  $\beta$ -arrestin1-*wt* or mutant  $\beta$ -arrestin1-S412D protein.** 1.4  $\mu$ g of *wt* ( $\beta$ -arrestin1-*wt*-HA) or 1.4  $\mu$ g of the mutant S412D ( $\beta$ -arrestin1-S412D-Flag), a  $\beta$ -arrestin1 locked in the phosphorylated form, were transfected in Hek293 cells. All the samples were co-transfected with an active intracellular form of Notch3 (Notch3-IC-HA) (0.7  $\mu$ g). Average fold change of each protein was calculated by normalization to  $\beta$ -actin levels.

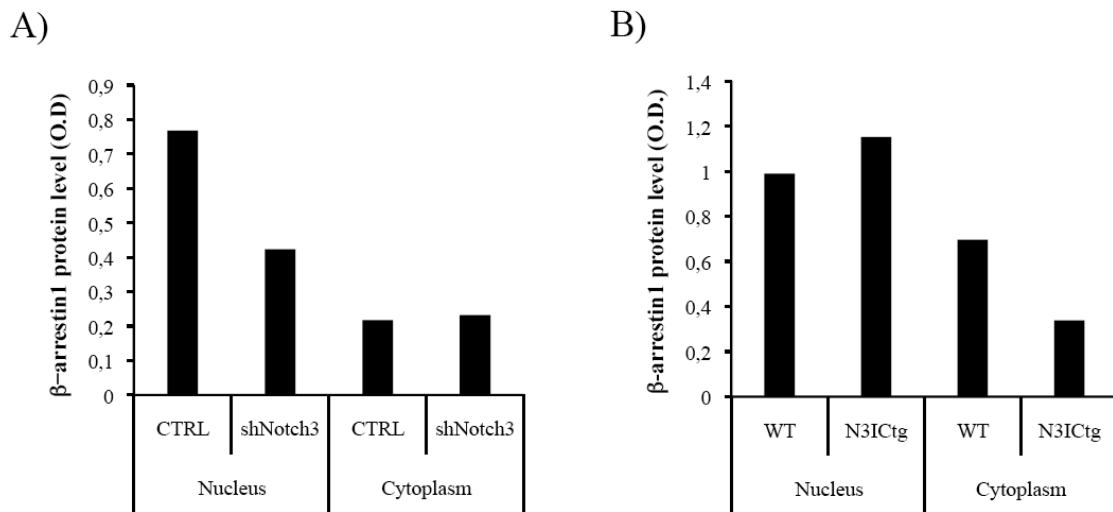

**Supplementary Figure S8. Differential  $\beta$ -arrestin1 protein levels in nucleus and cytoplasm.** Optical densitometry (OD) of  $\beta$ -arrestin1 in fractionated extract A) of Notch3 silenced TALL-1 (shNotch3) and control (CTRL) cells, and B) of WT and N3-ICtg DP/CD8<sup>+</sup> purified thymocytes of 6-8 week-old mice. Average fold change of each protein was calculated by normalization to lamin-B or to  $\alpha$ -tubulin levels. Densitometry was performed on scanned immunoblot images using ImageJ.

A)

Pediatric T-ALL patients  
tal1 subgroup (n=24)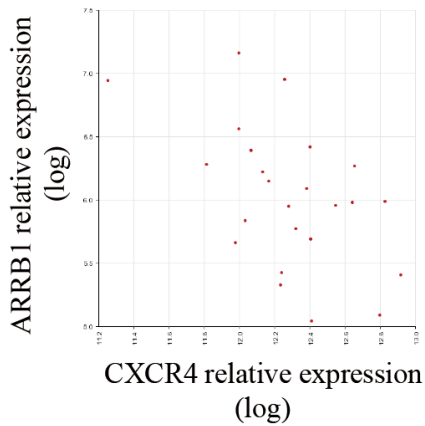

Pearson  $r = -0.52$   
 p-value = 0.0092

B)

Pediatric T-ALL patients  
tal1, tlx1 and tlx3 subgroup (n=53)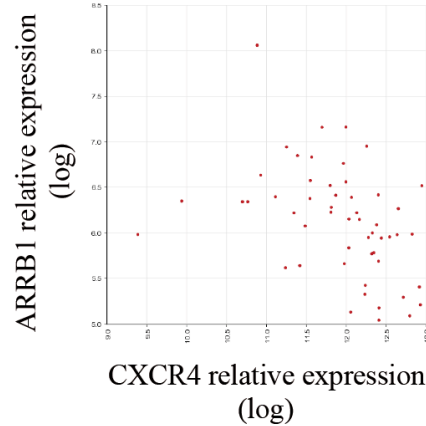

Pearson  $r = -0.408$   
 p-value = 0.0024

### Supplementary Figure S9. CXCR4 and ARRB1 levels correlate in T-ALL patients.

Graphs showing the inverse correlation between CXCR4 (CXCR4) and  $\beta$ -arrestin1 (ARRB1) gene expression levels obtained by an *in silico* analysis using the expression of probes set 217028\_at and set 222912\_at representing the CXCR4 and ARRB1, respectively, in a cohort of (A) 24 tal1 pediatric T-ALL patients (B) 53 (tal1, tlx1 and tlx3 subgroup) pediatric T-ALL patients. In all graphs (A-B), each dot corresponds to one patient and the expression value of CXCR4 and ARRB1 is given in log<sub>2</sub> scale after normalizing data with mas5.0 normalization algorithm. The X-Y axis represent CXCR4 and ARRB1 expression levels, respectively. The index Pearson  $r$  expresses the linear relation between paired samples and p-values were calculated using Student's t-test.
